# Supplementary material for: Engineering of Effector Domains for Targeted DNA Methylation with Reduced Off-Target Effects
Source: PubMed Central journal article supplement (PMC7013458; doi:10.3390/ijms21020502), 2020-01-13
Supplement: ijms-21-00502-s001.pdf [file ijms-21-00502-s001.pdf]

# Engineering of effector domains for targeted DNA methylation with reduced off-target effects

Daniel Hofacker<sup>1</sup>, Julian Broche<sup>1</sup>, Laura Laistner, Sabrina Adam, Pavel Bashtrykov\* and Albert Jeltsch\*

<sup>1</sup>These authors contributed equally to this work.

\*Corresponding authors.

## Supplemental materials

### Supplementary figures

Supplementary figure 1: Compilation of bisulfite conversion rates.

Supplementary figure 2: Compilation of the bis-seq DNA methylation data shown in aggregated form in Figure 2-4.

Supplementary figure 3: New DNA methylation peaks identified after treatment of cells with dCS, Ab-3A3L and the ISG15 sgRNA.

Supplementary figure 4: Signals of MBD-seq data in the CGIs of the *ISG15*, *VEGFA*, *ACTB* and *GAPDH* genes extracted using the multiBigwigSummary tool.

Supplementary figure 5: IGV views of MBD-seq data displayed for the two additional off-target regions *ACTB* and *GAPDH*.

### Supplementary tables

Supplementary table 1: Potential off-target binding sites of the *ISG15* sgRNA used in this study as identified by <http://www.rgenome.net/cas-offfinder/>.

Supplementary table 2: Primers used in this work.

**Supplementary figure 1:** Compilation of bisulfite conversion rates. Bisulfite conversion was determined based on the read count of cytosine residues at non-CpG sites after bisulfite conversion of genomic DNA isolated from untransfected cells in two experimental repeats (Rep. 1 and Rep. 2).

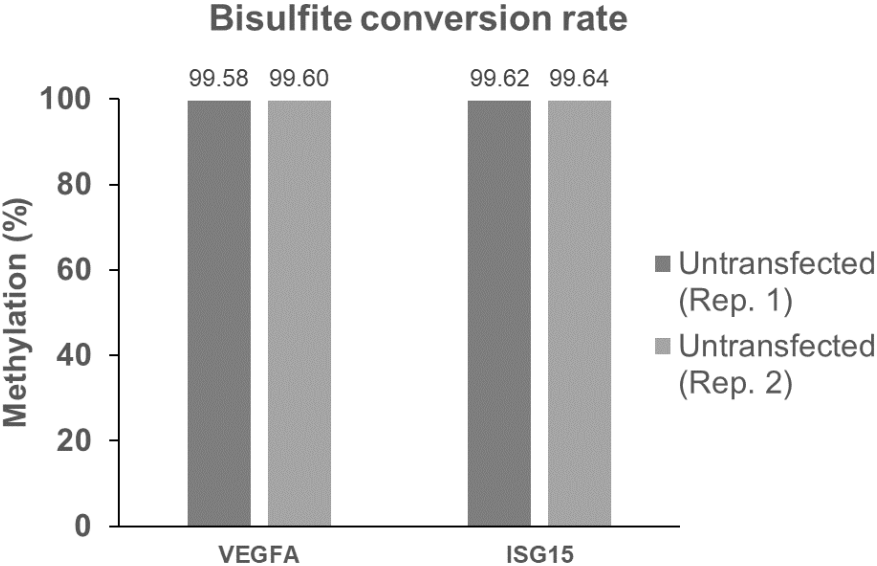

**Supplemental figure 2:** Compilation of the bis-seq DNA methylation data shown in aggregated form in Figure 2-4. In each case, the x-axis displays the individual numbered CpG sites. For the experimental conditions, refer to the legends of the individual main figures.

**Methylation of VEGFA in Fig. 2D**

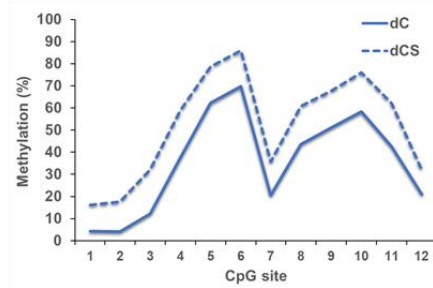

**Methylation of ISG15 and VEGFA in Fig. 3B**

**ISG15**

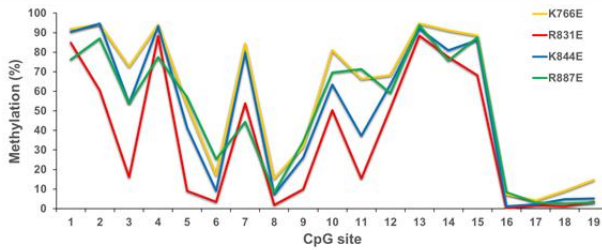

**VEGFA**

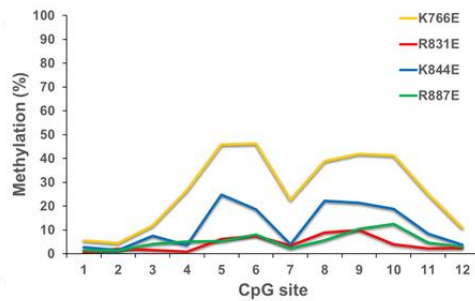

**Methylation of VEGFA in Fig. 3D**

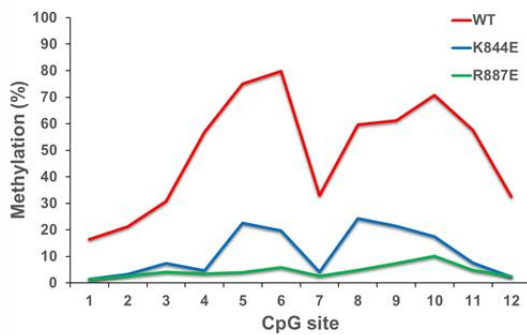

**Methylation of VEGFA in Fig. 5C**

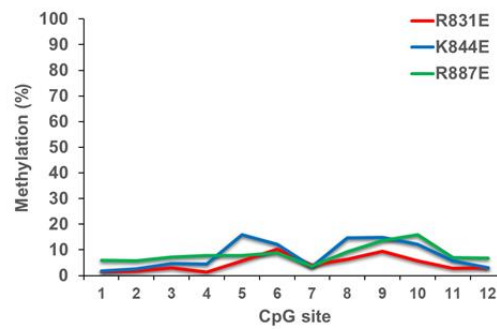

**Supplementary figure 3:** New DNA methylation peaks identified after treatment of cells with dCS, Ab-3A3L and the ISG15 sgRNA. Newly appearing MBD-seq peaks were intersected with all CGIs. 1943 out of 12,864 newly appearing MBD-seq peaks (15%) were not within an annotated CGI. Among them, only 263 peaks were more than 1 kb apart from the next CGI (2% of all newly appearing peaks).

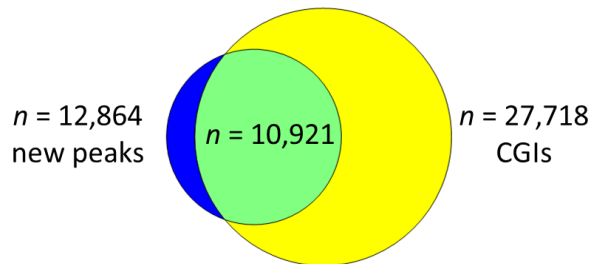

**Supplementary figure 4:** Signals of MBD-seq data in the CGIs of the *ISG15*, *VEGFA*, *ACTB* and *GAPDH* genes extracted using the multiBigwigSummary tool. Note the reduced relative activity of the K844E and R887E variants at the off-target sites. Cells were treated with dCS, Ab-3A3L with indicated mutations in the DNMT3A part and the ISG15 sgRNA.

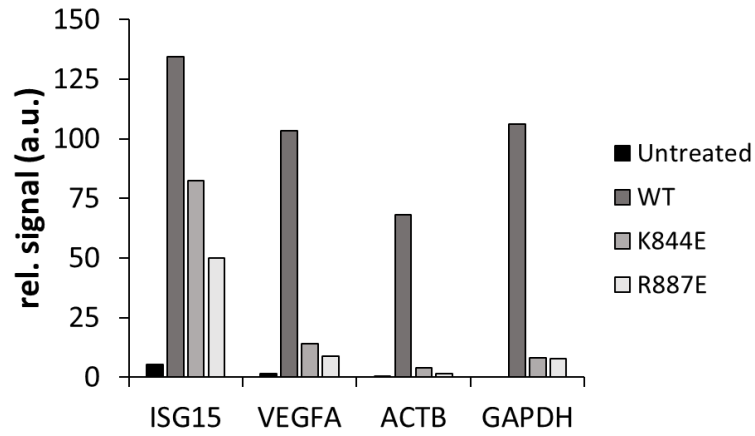

**Supplementary figure 5:** IGV views of MBD-seq data displayed for the two additional off-target regions *ACTB* and *GAPDH*. Cells were treated with dCS, Ab-3A3L with indicated mutations in the DNMT3A part and the ISG15 sgRNA. The wild type DNMT3A (WT) demonstrated higher off-target methylation levels than the K844E or R887E variants.

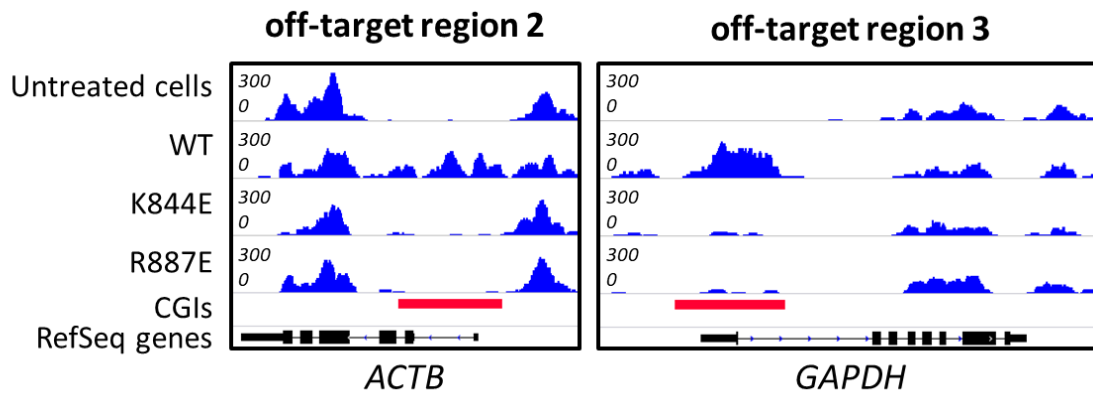

**Supplementary table 1:** Potential off-target binding sites of the *ISG15* sgRNA used in this study as identified by <http://www.rgenome.net/cas-offinder/>.

| #Bulge type | crRNA                       | DNA                          | Chromosome | Position  | Direction | Mismatches | Bulge Size |
|-------------|-----------------------------|------------------------------|------------|-----------|-----------|------------|------------|
| X           | GTTCGCTGCCTCTCAGCC<br>GCNGG | GgTCGCTGCCTCTCcaCCG<br>gAGG  | chr8       | 17104884  | +         | 4          | 0          |
| X           | GTTCGCTGCCTCTCAGCC<br>GCNGG | GTTaGCTGCCTCTCgGtCG<br>CCGG  | chr8       | 43406533  | -         | 3          | 0          |
| X           | GTTCGCTGCCTCTCAGCC<br>GCNGG | GaTCGaTtCCTCTCAGCCa<br>CAGG  | chr8       | 62815042  | -         | 4          | 0          |
| X           | GTTCGCTGCCTCTCAGCC<br>GCNGG | aTTCaCaGCaTCTCAGCCG<br>CAGG  | chr8       | 81805938  | +         | 4          | 0          |
| X           | GTTCGCTGCCTCTCAGCC<br>GCNGG | tTTCcTtCCTCTCAGCCc<br>TGG    | chr8       | 124933078 | +         | 4          | 0          |
| X           | GTTCGCTGCCTCTCAGCC<br>GCNGG | tTTtGCTGCCTgTCAGctGC<br>AGG  | chr12      | 73776344  | +         | 4          | 0          |
| X           | GTTCGCTGCCTCTCAGCC<br>GCNGG | GTTTCgtTaaCTCTCAGctG<br>CAGG | chr12      | 86975240  | -         | 4          | 0          |
| X           | GTTCGCTGCCTCTCAGCC<br>GCNGG | GgaaGCTGCCaCTCAGCC<br>GCAGG  | chr12      | 95397507  | +         | 4          | 0          |
| X           | GTTCGCTGCCTCTCAGCC<br>GCNGG | tTTCtCTGCCTCTCAGctGg<br>AGG  | chr12      | 105098325 | +         | 4          | 0          |
| X           | GTTCGCTGCCTCTCAGCC<br>GCNGG | GTTCCtCtCCTCTCAcCtGC<br>TGG  | chr12      | 112605777 | +         | 4          | 0          |
| X           | GTTCGCTGCCTCTCAGCC<br>GCNGG | tTTCtCTGCCaCTCAGaCG<br>CAGG  | chr12      | 124094533 | +         | 4          | 0          |
| X           | GTTCGCTGCCTCTCAGCC<br>GCNGG | aTTCcCTGCCTtTCAGCCG<br>gTGG  | chr3       | 51727405  | +         | 4          | 0          |
| X           | GTTCGCTGCCTCTCAGCC<br>GCNGG | GTTtCtAaCCTCcCAGCctC<br>TGG  | chr3       | 59181111  | -         | 4          | 0          |
| X           | GTTCGCTGCCTCTCAGCC<br>GCNGG | GTTaGCTGgCTgTCAGCgG<br>CAGG  | chr3       | 132824091 | +         | 4          | 0          |
| X           | GTTCGCTGCCTCTCAGCC<br>GCNGG | GTTaGCTGtCTCTgGCCG<br>CCGG   | chr3       | 186728772 | +         | 4          | 0          |
| X           | GTTCGCTGCCTCTCAGCC<br>GCNGG | GTTTcCtCCTCTCAGCCc<br>TGG    | chr7       | 2508465   | +         | 4          | 0          |
| X           | GTTCGCTGCCTCTCAGCC<br>GCNGG | GgTtGCTGCCTCTCAGCCc<br>tAGG  | chr7       | 50567760  | +         | 4          | 0          |
| X           | GTTCGCTGCCTCTCAGCC<br>GCNGG | GTCaGCTGCCTCcCgGCCG<br>CCGG  | chr7       | 101460483 | +         | 3          | 0          |
| X           | GTTCGCTGCCTCTCAGCC<br>GCNGG | GTTCCtGgCcCtGAGCCG<br>CGGG   | chr7       | 139344168 | +         | 4          | 0          |
| X           | GTTCGCTGCCTCTCAGCC<br>GCNGG | GTTaGCTGtCTCTgGCCG<br>CTGG   | chr4       | 8430973   | -         | 4          | 0          |
| X           | GTTCGCTGCCTCTCAGCC<br>GCNGG | GTTaGCTGCCTCTCgGtCG<br>CCGG  | chr4       | 25522958  | +         | 3          | 0          |
| X           | GTTCGCTGCCTCTCAGCC<br>GCNGG | GTTCCgGcTtTCTCAGCCa<br>CTGG  | chr4       | 40337256  | +         | 4          | 0          |
| X           | GTTCGCTGCCTCTCAGCC<br>GCNGG | GTTTcTGCCTCTCtGCctg<br>AGG   | chr4       | 75658461  | +         | 4          | 0          |
| X           | GTTCGCTGCCTCTCAGCC<br>GCNGG | tTcCGCTGaCTCTCAGCCc<br>CGGG  | chr4       | 109572018 | +         | 4          | 0          |
| X           | GTTCGCTGCCTCTCAGCC<br>GCNGG | GTTaGCTGCacCTCAGctG<br>CAGG  | chr4       | 141746720 | +         | 4          | 0          |
| X           | GTTCGCTGCCTCTCAGCC<br>GCNGG | GgcCGCaGCCTCTCAGCC<br>GCCGG  | chr5       | 14664836  | -         | 3          | 0          |

|   |                              |                              |       |           |   |   |   |
|---|------------------------------|------------------------------|-------|-----------|---|---|---|
| X | GTTTCGCTGCCTCTCAGCC<br>GCNNG | GTTTCGCTGCCTgaCAtCtG<br>CAGG | chr16 | 4884173   | - | 4 | 0 |
| X | GTTTCGCTGCCTCTCAGCC<br>GCNNG | GTgCGCTGCCTCcCAGgaG<br>CCGG  | chr16 | 12213529  | + | 4 | 0 |
| X | GTTTCGCTGCCTCTCAGCC<br>GCNNG | GaTCGCTGCTCcCAGCCt<br>CAGG   | chr16 | 27250582  | + | 4 | 0 |
| X | GTTTCGCTGCCTCTCAGCC<br>GCNNG | GTTTCGCTGCCTCTCAGCC<br>GCCGG | chr1  | 948874    | - | 0 | 0 |
| X | GTTTCGCTGCCTCTCAGCC<br>GCNNG | tTTCcCTGtCTCTCAGctGC<br>AGG  | chr1  | 17986443  | - | 4 | 0 |
| X | GTTTCGCTGCCTCTCAGCC<br>GCNNG | GTgCcCTcCtTCTCAGCCG<br>CTGG  | chr1  | 26508857  | - | 4 | 0 |
| X | GTTTCGCTGCCTCTCAGCC<br>GCNNG | GacCcCTGCCTCTCAGCCc<br>CTGG  | chr1  | 32716729  | - | 4 | 0 |
| X | GTTTCGCTGCCTCTCAGCC<br>GCNNG | GTTTCcCTGaCTCTAcCCtC<br>GGG  | chr1  | 41760952  | - | 4 | 0 |
| X | GTTTCGCTGCCTCTCAGCC<br>GCNNG | GTTaGCcatCTCTCAGCCG<br>CTGG  | chr1  | 146710912 | + | 4 | 0 |
| X | GTTTCGCTGCCTCTCAGCC<br>GCNNG | GTTCaCTGCCTCTCAGctG<br>tGGG  | chr1  | 215131205 | + | 3 | 0 |
| X | GTTTCGCTGCCTCTCAGCC<br>GCNNG | GgTCctTGCTCTCAGctG<br>CTGG   | chr1  | 220325057 | - | 4 | 0 |
| X | GTTTCGCTGCCTCTCAGCC<br>GCNNG | tTcCtCTGCCTCTCAGCCtC<br>CGG  | chr1  | 225931264 | - | 4 | 0 |
| X | GTTTCGCTGCCTCTCAGCC<br>GCNNG | GTgCGCTtCCTCTgAGCCa<br>CTGG  | chr13 | 26423100  | + | 4 | 0 |
| X | GTTTCGCTGCCTCTCAGCC<br>GCNNG | GcTgGCcGCCTCTCcGCCG<br>CTGG  | chr2  | 90284246  | + | 4 | 0 |
| X | GTTTCGCTGCCTCTCAGCC<br>GCNNG | GcTgGCcGCCTCTCcGCCG<br>CTGG  | chr2  | 90284228  | + | 4 | 0 |
| X | GTTTCGCTGCCTCTCAGCC<br>GCNNG | GcTgGCcGCCTCTCcGCCG<br>CTGG  | chr2  | 90527824  | - | 4 | 0 |
| X | GTTTCGCTGCCTCTCAGCC<br>GCNNG | GcTgGCcGCCTCTCcGCCG<br>CTGG  | chr2  | 90527806  | - | 4 | 0 |
| X | GTTTCGCTGCCTCTCAGCC<br>GCNNG | GgTgGCcGCCTCTCcGCCG<br>CTGG  | chr2  | 91750692  | - | 4 | 0 |
| X | GTTTCGCTGCCTCTCAGCC<br>GCNNG | GTTTCcCTGCCTCcCAGCCc<br>aGGG | chr2  | 96763987  | + | 4 | 0 |
| X | GTTTCGCTGCCTCTCAGCC<br>GCNNG | GTTacCTGCCTCTCAGCCc<br>tGGG  | chr2  | 161960608 | + | 4 | 0 |
| X | GTTTCGCTGCCTCTCAGCC<br>GCNNG | GTgCGCTGCCTCTgcccCG<br>CGGG  | chr2  | 175205238 | + | 4 | 0 |
| X | GTTTCGCTGCCTCTCAGCC<br>GCNNG | GTTTCcCTGCATCTCATCCcC<br>AGG | chr2  | 199599312 | - | 4 | 0 |
| X | GTTTCGCTGCCTCTCAGCC<br>GCNNG | GTTaGCTGtCTCTgGCCG<br>CCGG   | chr2  | 201990826 | - | 4 | 0 |
| X | GTTTCGCTGCCTCTCAGCC<br>GCNNG | GcTgGCTGctTCTCAGCaG<br>CTGG  | chr22 | 27533888  | + | 4 | 0 |
| X | GTTTCGCTGCCTCTCAGCC<br>GCNNG | aTTaGCTGCCTCTcGtCG<br>CCGG   | chr22 | 39507745  | + | 4 | 0 |
| X | GTTTCGCTGCCTCTCAGCC<br>GCNNG | GTTtcCcGCCTCTCAGgCG<br>CGGG  | chr22 | 41864477  | - | 4 | 0 |
| X | GTTTCGCTGCCTCTCAGCC<br>GCNNG | tcTCGCTGcCtCTCAGCCG<br>CAGG  | chr19 | 2207686   | + | 4 | 0 |
| X | GTTTCGCTGCCTCTCAGCC<br>GCNNG | GTTTCctTcCCTCTCAGCCtC<br>TGG | chr19 | 8828214   | - | 4 | 0 |



|   |                              |                             |       |           |   |   |   |
|---|------------------------------|-----------------------------|-------|-----------|---|---|---|
| X | GTTTCGCTGCCTCTCAGCC<br>GCNNG | GTTaGCTGtCTCTgGCCG<br>CTGG  | chr19 | 23369142  | - | 4 | 0 |
| X | GTTTCGCTGCCTCTCAGCC<br>GCNNG | GgTCGCTGaCTCaCAGCC<br>GCAGG | chr19 | 46010136  | - | 3 | 0 |
| X | GTTTCGCTGCCTCTCAGCC<br>GCNNG | GcTaGCTGtCTCTCAGtCG<br>CTGG | chr19 | 51253303  | + | 4 | 0 |
| X | GTTTCGCTGCCTCTCAGCC<br>GCNNG | tgTctCTGCCTCTCAGCCc<br>CGG  | chr19 | 51585940  | - | 4 | 0 |
| X | GTTTCGCTGCCTCTCAGCC<br>GCNNG | aTggGCTGCCaCTCAGCCG<br>CGGG | chr21 | 44775160  | + | 4 | 0 |
| X | GTTTCGCTGCCTCTCAGCC<br>GCNNG | GTTaGCTGgCTCTCAGCct<br>CAGG | chr15 | 28106352  | + | 3 | 0 |
| X | GTTTCGCTGCCTCTCAGCC<br>GCNNG | GTTaGCTcCTTCAGCctC<br>TGG   | chr15 | 94806594  | + | 4 | 0 |
| X | GTTTCGCTGCCTCTCAGCC<br>GCNNG | GTTaGCTGCCTCTCcGtCG<br>CTGG | chrY  | 9938947   | + | 3 | 0 |
| X | GTTTCGCTGCCTCTCAGCC<br>GCNNG | GTTtGgTGCTgTCAGCCG<br>tGGG  | chr17 | 4982094   | + | 4 | 0 |
| X | GTTTCGCTGCCTCTCAGCC<br>GCNNG | GcTtGCTGCCTtTCAGCaG<br>CTGG | chr17 | 17143558  | - | 4 | 0 |
| X | GTTTCGCTGCCTCTCAGCC<br>GCNNG | GTcCtCTGCCTaTCAGaCG<br>CCGG | chr17 | 21187912  | - | 4 | 0 |
| X | GTTTCGCTGCCTCTCAGCC<br>GCNNG | GcTaGCTGtCTCTCAGtCG<br>CCGG | chr17 | 66065887  | - | 4 | 0 |
| X | GTTTCGCTGCCTCTCAGCC<br>GCNNG | GgTCctGCCTCgCAGCCG<br>CCGG  | chr6  | 5260751   | + | 4 | 0 |
| X | GTTTCGCTGCCTCTCAGCC<br>GCNNG | GTgCGCctCCTCTCAGCaG<br>CCGG | chr6  | 40638930  | + | 4 | 0 |
| X | GTTTCGCTGCCTCTCAGCC<br>GCNNG | GTgCGCTGggTCTCAGCCc<br>CGGG | chr6  | 111303336 | + | 4 | 0 |
| X | GTTTCGCTGCCTCTCAGCC<br>GCNNG | GTTTctGCCTgTgAGCCc<br>CTGG  | chr6  | 145779528 | - | 4 | 0 |
| X | GTTTCGCTGCCTCTCAGCC<br>GCNNG | GTTaGcGtCTCTCAGtCG<br>CCGG  | chr6  | 153003705 | + | 4 | 0 |
| X | GTTTCGCTGCCTCTCAGCC<br>GCNNG | GTTcCtGCCTCTtAGtG<br>gAGG   | chr14 | 24576358  | - | 4 | 0 |
| X | GTTTCGCTGCCTCTCAGCC<br>GCNNG | GTTCaCTGCCTTgAGtG<br>gTGG   | chr14 | 47936202  | - | 4 | 0 |
| X | GTTTCGCTGCCTCTCAGCC<br>GCNNG | GTTgGgTGCTCTCAGCC<br>GtGGG  | chr14 | 56824336  | + | 3 | 0 |
| X | GTTTCGCTGCCTCTCAGCC<br>GCNNG | GTTTCGCTGcCgCgGCCG<br>CCGG  | chr14 | 75745570  | - | 4 | 0 |
| X | GTTTCGCTGCCTCTCAGCC<br>GCNNG | cTTCcCTaCCTgTCAGCCG<br>CTGG | chr14 | 78346500  | + | 4 | 0 |
| X | GTTTCGCTGCCTCTCAGCC<br>GCNNG | GTTaGCTGtCTCTgGCCG<br>CCGG  | chr14 | 101561691 | + | 4 | 0 |
| X | GTTTCGCTGCCTCTCAGCC<br>GCNNG | GTTCaCTGCCTCTcCCcC<br>AGG   | chr20 | 15601656  | - | 4 | 0 |
| X | GTTTCGCTGCCTCTCAGCC<br>GCNNG | cTTgGCTcCCTCTCAGtG<br>CTGG  | chr9  | 87015605  | - | 4 | 0 |
| X | GTTTCGCTGCCTCTCAGCC<br>GCNNG | GcTgGCTGCCTCTCAGCa<br>GtGGG | chr9  | 95402183  | - | 4 | 0 |
| X | GTTTCGCTGCCTCTCAGCC<br>GCNNG | tcTctCTGaCTCTCAGCCG<br>CTGG | chr9  | 128801012 | - | 4 | 0 |
| X | GTTTCGCTGCCTCTCAGCC<br>GCNNG | ccTCcCTGCCTCTCAGCCc<br>CTGG | chr9  | 132005010 | - | 4 | 0 |

|   |                              |                               |       |           |   |   |   |
|---|------------------------------|-------------------------------|-------|-----------|---|---|---|
| X | GTTTCGCTGCCTCTCAGCC<br>GCNNG | GTTTcCTGCCTCaCAGgaG<br>CCGG   | chr9  | 138022430 | + | 4 | 0 |
| X | GTTTCGCTGCCTCTCAGCC<br>GCNNG | cTTtGCTtCCTCTCAGCaGC<br>CGG   | chr9  | 137943631 | - | 4 | 0 |
| X | GTTTCGCTGCCTCTCAGCC<br>GCNNG | GTTCaCTGCCaCTCAGCct<br>gAGG   | chrX  | 44601032  | + | 4 | 0 |
| X | GTTTCGCTGCCTCTCAGCC<br>GCNNG | GTTTcCTGCCTCaCTCAGCct<br>CTGG | chrX  | 53032189  | + | 4 | 0 |
| X | GTTTCGCTGCCTCTCAGCC<br>GCNNG | GTTaGCTGCCTCTCgGtCG<br>CCGG   | chr18 | 52057540  | - | 3 | 0 |
| X | GTTTCGCTGCCTCTCAGCC<br>GCNNG | GTTgGCaGCaTCTCAGCC<br>GCAGG   | chr18 | 56452683  | - | 3 | 0 |
| X | GTTTCGCTGCCTCTCAGCC<br>GCNNG | GTTTcCTGCCTCaTCTCaCCa<br>CAGG | chr11 | 6072400   | - | 4 | 0 |
| X | GTTTCGCTGCCTCTCAGCC<br>GCNNG | GTTTCGCTGCCTCaCAGttc<br>CTGG  | chr11 | 18765551  | - | 4 | 0 |
| X | GTTTCGCTGCCTCTCAGCC<br>GCNNG | GcTtCTGCCTCTgAGCct<br>CAGG    | chr11 | 48542507  | + | 4 | 0 |
| X | GTTTCGCTGCCTCTCAGCC<br>GCNNG | GcTtCTGCCTCTgAGCct<br>CAGG    | chr11 | 48643596  | + | 4 | 0 |
| X | GTTTCGCTGCCTCTCAGCC<br>GCNNG | GaTtCTGCCTCTgAGCct<br>CAGG    | chr11 | 48607292  | + | 4 | 0 |
| X | GTTTCGCTGCCTCTCAGCC<br>GCNNG | GcTtCTGCCTCTgAGCct<br>CAGG    | chr11 | 51400389  | - | 4 | 0 |
| X | GTTTCGCTGCCTCTCAGCC<br>GCNNG | GcTtCTGCCTCTgAGCct<br>CGGG    | chr11 | 51431909  | - | 4 | 0 |
| X | GTTTCGCTGCCTCTCAGCC<br>GCNNG | GcTtCTGCCTCTgAGCct<br>CAGG    | chr11 | 55081356  | + | 4 | 0 |
| X | GTTTCGCTGCCTCTCAGCC<br>GCNNG | GcTtCTGCCTCTgAGCct<br>CAGG    | chr11 | 55151318  | + | 4 | 0 |
| X | GTTTCGCTGCCTCTCAGCC<br>GCNNG | GTTTcCTGCCTCTgAGCct<br>CAGG   | chr11 | 55203729  | + | 3 | 0 |
| X | GTTTCGCTGCCTCTCAGCC<br>GCNNG | GaTtCTGCCTCTgAGCct<br>CAGG    | chr11 | 55238900  | + | 4 | 0 |
| X | GTTTCGCTGCCTCTCAGCC<br>GCNNG | GcTtCTGCCTCTgAGCct<br>CAGG    | chr11 | 55193084  | + | 4 | 0 |
| X | GTTTCGCTGCCTCTCAGCC<br>GCNNG | tTTaGCTGCCTCTCaA CtG<br>CAGG  | chr11 | 64007861  | + | 4 | 0 |
| X | GTTTCGCTGCCTCTCAGCC<br>GCNNG | GccCaCaGCCTCTCAGCCG<br>CAGG   | chr11 | 69354395  | + | 4 | 0 |
| X | GTTTCGCTGCCTCTCAGCC<br>GCNNG | GTTTcCaTGCTCTCAGCttC<br>TGG   | chr11 | 73316844  | - | 4 | 0 |
| X | GTTTCGCTGCCTCTCAGCC<br>GCNNG | GagCcCTGCCTCTCAGCct<br>CGGG   | chr11 | 76886328  | + | 4 | 0 |
| X | GTTTCGCTGCCTCTCAGCC<br>GCNNG | GgTgGCTGaCTCTCAGCa<br>GCCGG   | chr11 | 117917816 | - | 4 | 0 |
| X | GTTTCGCTGCCTCTCAGCC<br>GCNNG | GTTaGCcGCCTCTCgGgCG<br>CTGG   | chr11 | 125555674 | + | 4 | 0 |

**Supplementary table 2: Primers used in this work.**

Nucleotides highlighted by red color are inline barcodes, nucleotides printed in green are indices.  
NNNNN – random nucleotides, which were introduced to increase the sequence diversity of the library.

ISG15 primers for bis PCR1

FP1 ACACTCTTCCCTACACGACGCTCTCCGATCTNNNNN**AGAGC**TTAGGTGTTTTAGGGTGTGG  
RP1 GTGACTGGAGTTCAGACGTGTGCTCTCCGATCTNNNNN**AGCAT**CACAACTCCTATACTAACAAAAATAAT  
FP2 ACACTCTTCCCTACACGACGCTCTCCGATCTNNNNN**GACAT**TTAGGTGTTTTAGGGTGTGG  
RP2 GTGACTGGAGTTCAGACGTGTGCTCTCCGATCTNNNNN**GTCGT**CACAACTCCTATACTAACAAAAATAAT  
FP3 ACACTCTTCCCTACACGACGCTCTCCGATCTNNNNN**ATAGA**TTAGGTGTTTTAGGGTGTGG  
RP3 GTGACTGGAGTTCAGACGTGTGCTCTCCGATCTNNNNN**AAGCG**CACAACTCCTATACTAACAAAAATAAT  
FP4 ACACTCTTCCCTACACGACGCTCTCCGATCTNNNNN**GTGTA**TTAGGTGTTTTAGGGTGTGG  
RP4 GTGACTGGAGTTCAGACGTGTGCTCTCCGATCTNNNNN**GTCAC**CACAACTCCTATACTAACAAAAATAAT

VEGFA primers for bis PCR1

FP1 GTGACTGGAGTTCAGACGTGTGCTCTCCGATCTNNNNN**AGAGC**GTTTGTATTTTTATTGAAT  
RP1 ACACTCTTCCCTACACGACGCTCTCCGATCTNNNNN**AGCAT**AATCACTCACTTTACCCCTATC  
FP2 GTGACTGGAGTTCAGACGTGTGCTCTCCGATCTNNNNN**TGTCG**GTTTGTATTTTTATTGAAT  
RP2 ACACTCTTCCCTACACGACGCTCTCCGATCTNNNNN**TCAGC**AATCACTCACTTTACCCCTATC  
FP3 GTGACTGGAGTTCAGACGTGTGCTCTCCGATCTNNNNN**GACAT**GTTTGTATTTTTATTGAAT  
RP3 ACACTCTTCCCTACACGACGCTCTCCGATCTNNNNN**GTCGT**AATCACTCACTTTACCCCTATC  
FP4 GTGACTGGAGTTCAGACGTGTGCTCTCCGATCTNNNNN**CAGAT**GTTTGTATTTTTATTGAAT  
RP4 ACACTCTTCCCTACACGACGCTCTCCGATCTNNNNN**CGTGT**AATCACTCACTTTACCCCTATC

PCR2 primers with indices and Illumina adapters

P5 primers  
AATGATACGGCGACCACCGAGATCTACAC**ATTACTCG**ACACTCTTCCCTACACGACGCTCTCCGATCT  
AATGATACGGCGACCACCGAGATCTACAC**TCCGGAGA**ACACTCTTCCCTACACGACGCTCTCCGATCT  
AATGATACGGCGACCACCGAGATCTACAC**CGCTCATT**ACACTCTTCCCTACACGACGCTCTCCGATCT  
AATGATACGGCGACCACCGAGATCTACAC**GAGATTCC**ACACTCTTCCCTACACGACGCTCTCCGATCT  
AATGATACGGCGACCACCGAGATCTACAC**ATTCAGAA**ACACTCTTCCCTACACGACGCTCTCCGATCT  
AATGATACGGCGACCACCGAGATCTACAC**GAATTCGT**ACACTCTTCCCTACACGACGCTCTCCGATCT

P7 primers  
CAAGCAGAAGACGGCATAACGAGAT**CGAGTAAT**GTGACTGGAGTTCAGACGTGTGCTCTCCGATCT  
CAAGCAGAAGACGGCATAACGAGAT**TCTCCGGAG**GTGACTGGAGTTCAGACGTGTGCTCTCCGATCT  
CAAGCAGAAGACGGCATAACGAGAT**AATGAGCGG**GTGACTGGAGTTCAGACGTGTGCTCTCCGATCT  
CAAGCAGAAGACGGCATAACGAGAT**GGAATCTC**GTGACTGGAGTTCAGACGTGTGCTCTCCGATCT  
CAAGCAGAAGACGGCATAACGAGAT**TTCTGAAT**GTGACTGGAGTTCAGACGTGTGCTCTCCGATCT  
CAAGCAGAAGACGGCATAACGAGAT**ACGAATTC**GTGACTGGAGTTCAGACGTGTGCTCTCCGATCT
